# Supplementary material
Source: Springer Nature journal article supplement (https://www.springermedizin.de/resource/supplementary/13063_2013_1892_MOESM3_ESM.pdf/9620420)

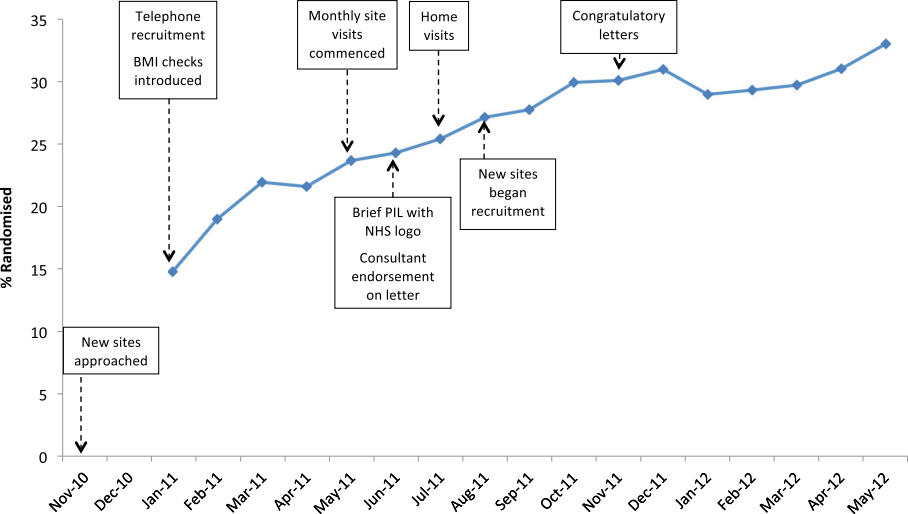

Supplement: MOESM3 [file 9620420]
